# Supplementary material for: Symbiotic strategy of exogenous carbon and NiCo-MOFs for intelligent switching of low/medium electromagnetic response bands
Source: Royal Society of Chemistry journal article supplement (doi:10.1039/d4nj05024j), 2025-01-01
Supplement: d4nj05024j1.pdf [file d4nj05024j1.pdf]

## Supporting information

### **Symbiotic strategy of exogenous carbon and NiCo-MOF for intelligent switching of low/medium electromagnetic-response bands**

Hanyu Yang<sup>a,1</sup>, Honghan Wang<sup>a,1</sup>, Xiaoling Dong<sup>a</sup>, Kairuo Zhu<sup>a</sup>, Xinghai Zhou<sup>b</sup>,  
Shangru Zhai<sup>a, c\*</sup>

<sup>a</sup> *College of Light Industry and Chemical Engineering, Dalian Polytechnic University,  
Dalian 116034, China*

<sup>b</sup> *School of Textile and Material Engineering, Dalian Polytechnic University, 116034,  
Dalian, PR China*

<sup>c</sup> *School of Environmental and Nature Resources, Zhejiang University of Science &  
Technology, Hangzhou, Zhejiang Province, 310023, China*

\*Corresponding author.

E-mail addresses: [zhairschem@163.com](mailto:zhairschem@163.com) (S.R. Zhai).

1 These authors contributed equally to this work.

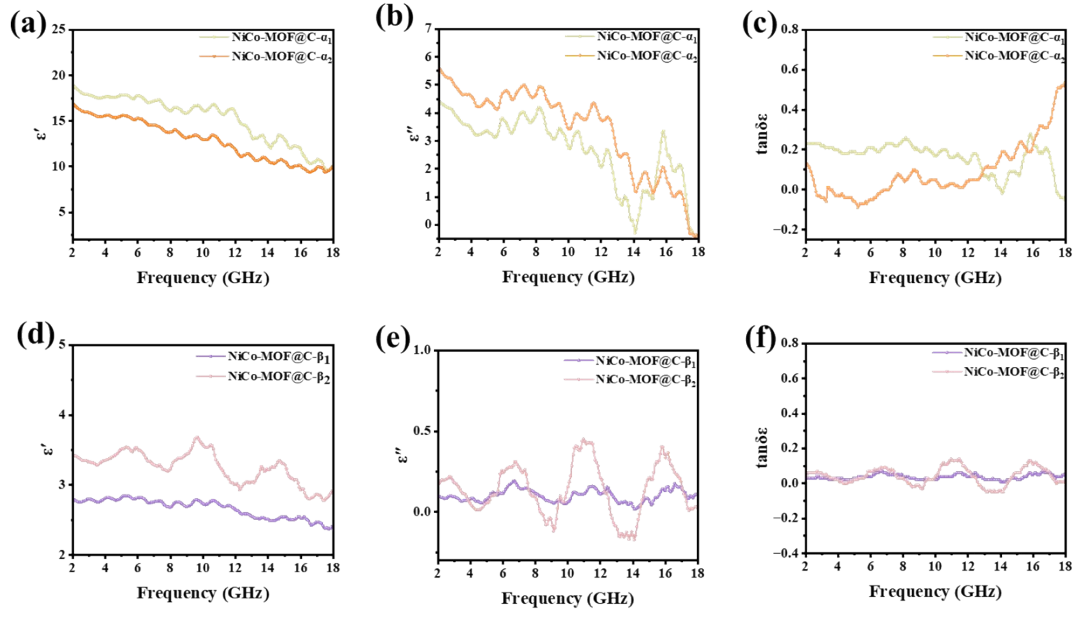

**Figure S1.** The complex permeability real part (a,d), imaginary part (b,e), and dielectric loss tangent (c,f) of NiCo-MOF@C- $\alpha_1$ , NiCo-MOF@C- $\alpha_2$  and NiCo-MOF@C- $\beta_1$ , NiCo-MOF@C- $\beta_2$ .

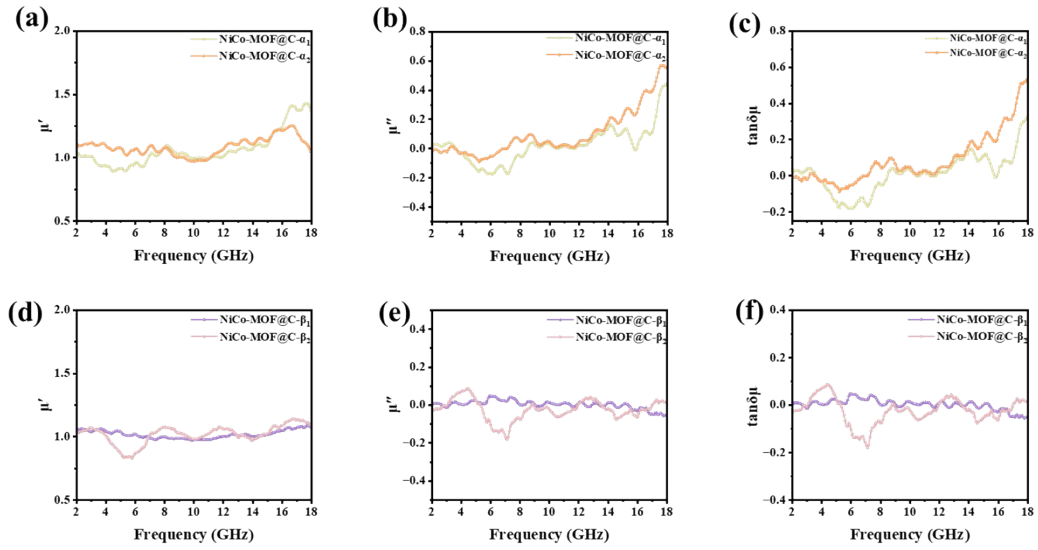

**Figure S2.** The complex permeability real part (a,d), imaginary part (b,e), and magnetic loss tangent (c,f) of NiCo-MOF@C- $\alpha_1$ , NiCo-MOF@C- $\alpha_2$  and NiCo-MOF@C- $\beta_1$ , NiCo-MOF@C- $\beta_2$ .

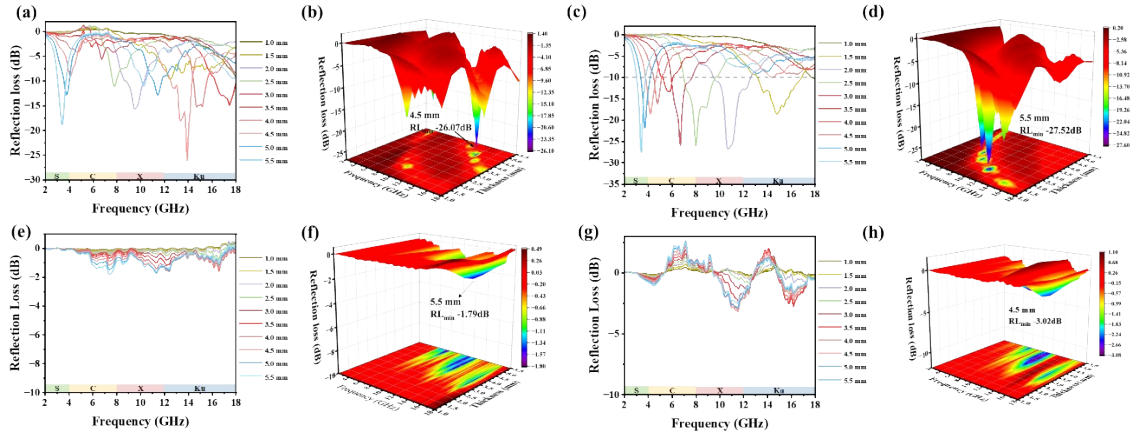

**Figure S3.** The 3D images and 2D contours of calculated RL values of NiCo-MOF@C- $\alpha_1$  (a-b), NiCo-MOF@C- $\alpha_2$  (c-d), NiCo-MOF@C- $\beta_1$  (e-f), and NiCo-MOF@C- $\beta_2$  (g-h).

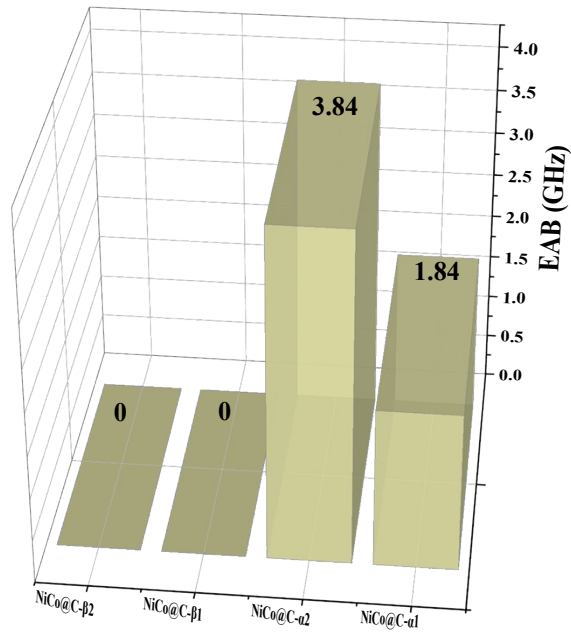

**Figure S4.** EAB of NiCo-MOF@C- $\alpha_1$ , NiCo-MOF@C- $\alpha_2$ , NiCo-MOF@C- $\beta_1$  and NiCo-MOF@C- $\beta_2$ .

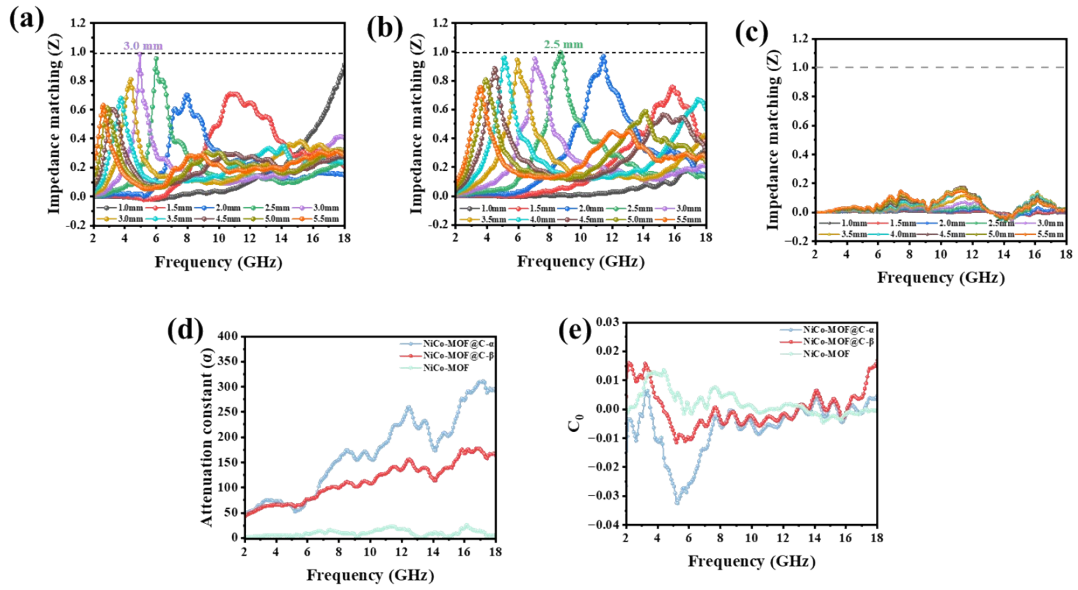

**Figure S5.** Impedance matching diagrams (a-c), attenuation constant curves (d) and  $C_0$  curves (e) for NiCo-MOF@C- $\alpha$ , NiCo-MOF@C- $\beta$  and NiCo-MOF.

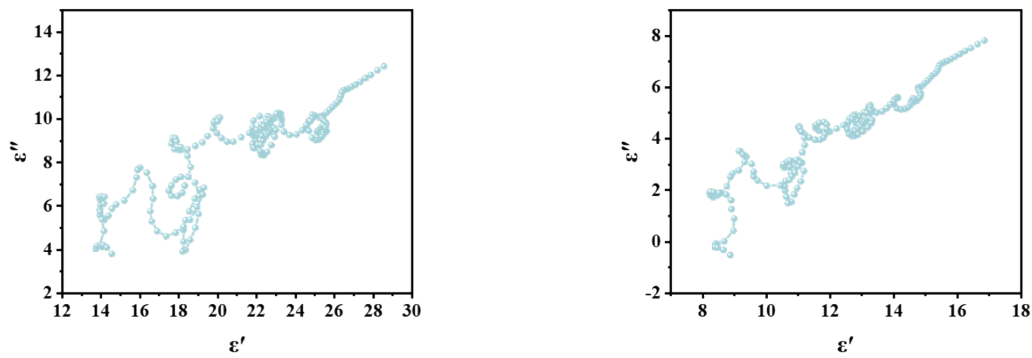

**Figure S6.** Cole-Cole curves of NiCo-MOF@C- $\alpha$  (a), NiCo-MOF@C- $\beta$  (b).

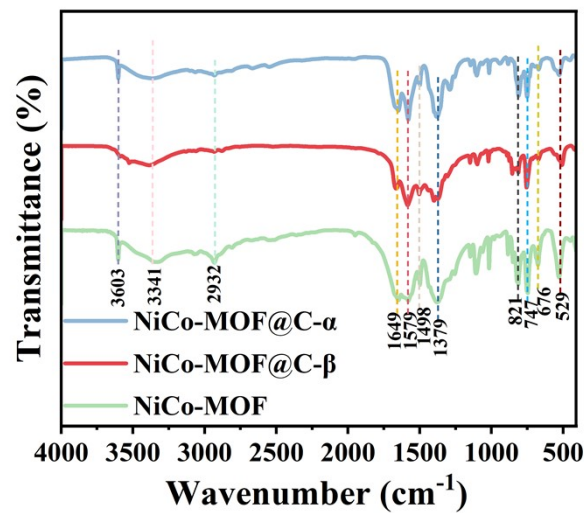

**Figure S7.** FT-IR spectrum of the NiCo-MOF, NiCo-MOF@C- $\alpha$  and NiCo-MOF@C- $\beta$ .
